# Supplementary material
Source: MDPI journal article supplement (https://www.mdpi.com/2073-4344/11/1/62)
Supplement: s1 [file s1]

# Modulation of Human Mesenchymal Stem Cells by Electrical Stimulation Using an Enzymatic Biofuel Cell

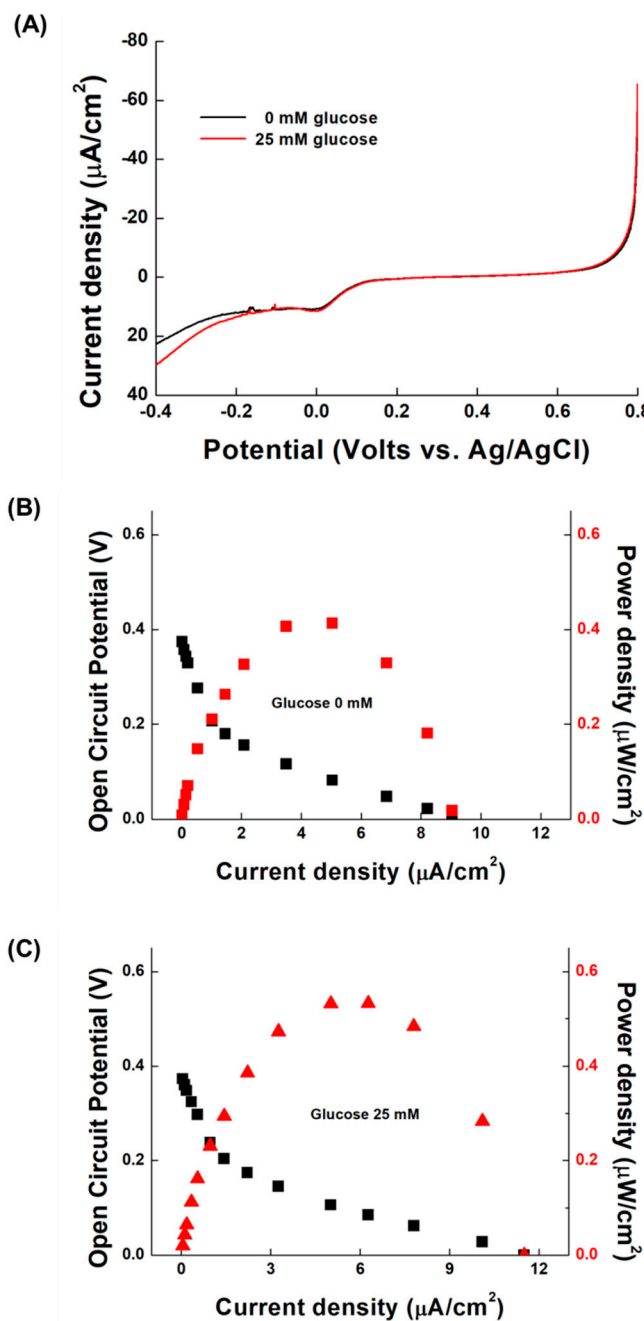

**Figure S1.** Linear sweep voltammogram (A) of cathode electrode with BOD and polarization curves with (B) 0mM and (C) 25 mM glucose.

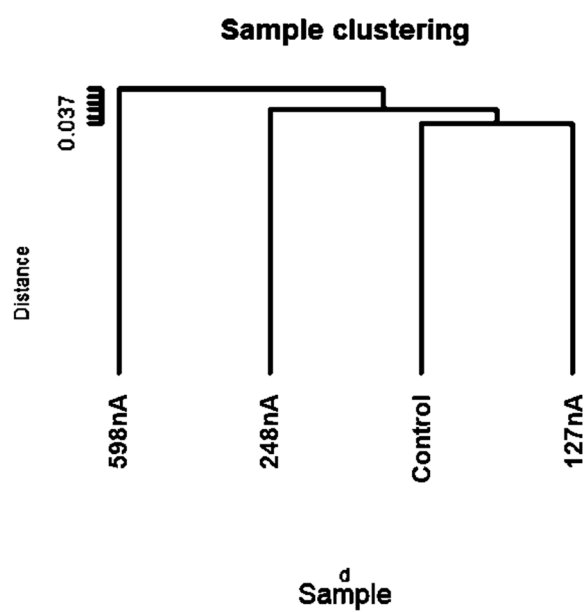

**Figure S2** Hierarchical clustering of the differentially expressed genes (DEGs) identified by RNA sequencing. Dendrogram of hierarchical clustering indicates the correlation between electrically-stimulated hAC-MSCs. The ruler in left side denotes the average distance between the analyzed samples.

**A****3ay Up regulation gene ontology: 127nA**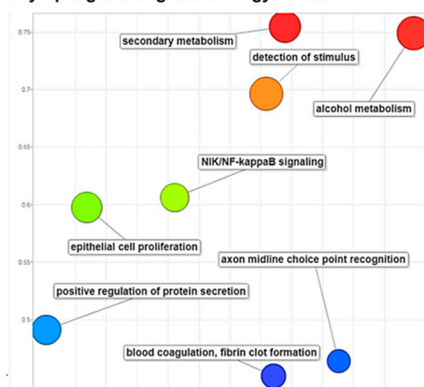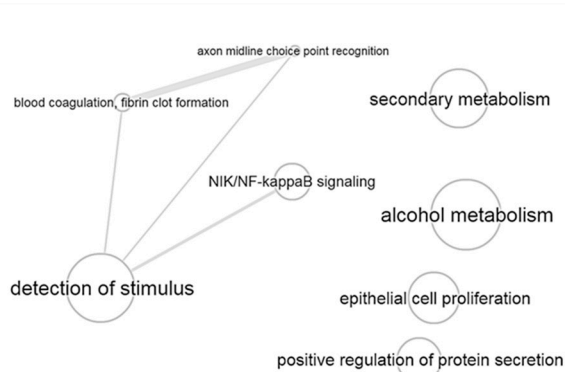**B****3ay Up regulation gene ontology: 248nA**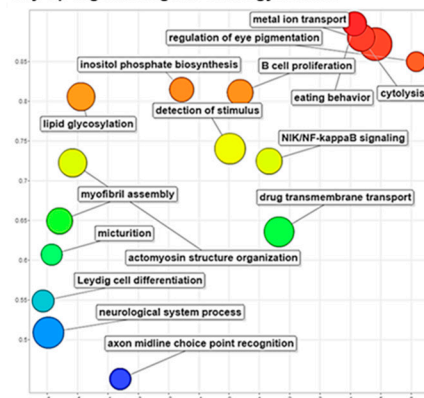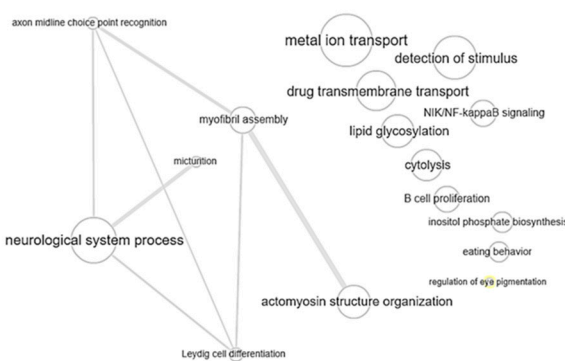**C****3ay Up regulation gene ontology: 598nA**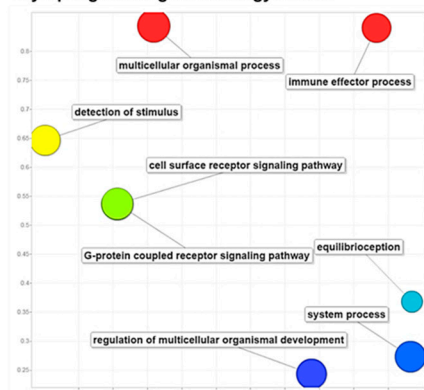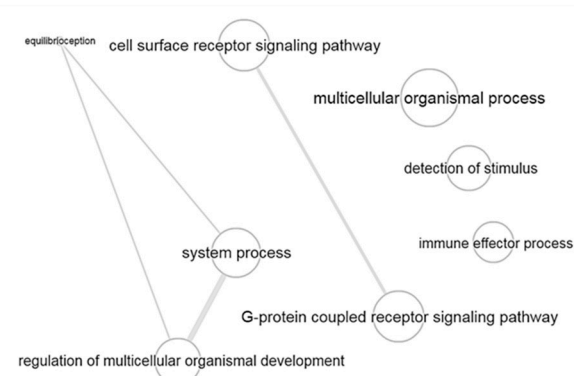

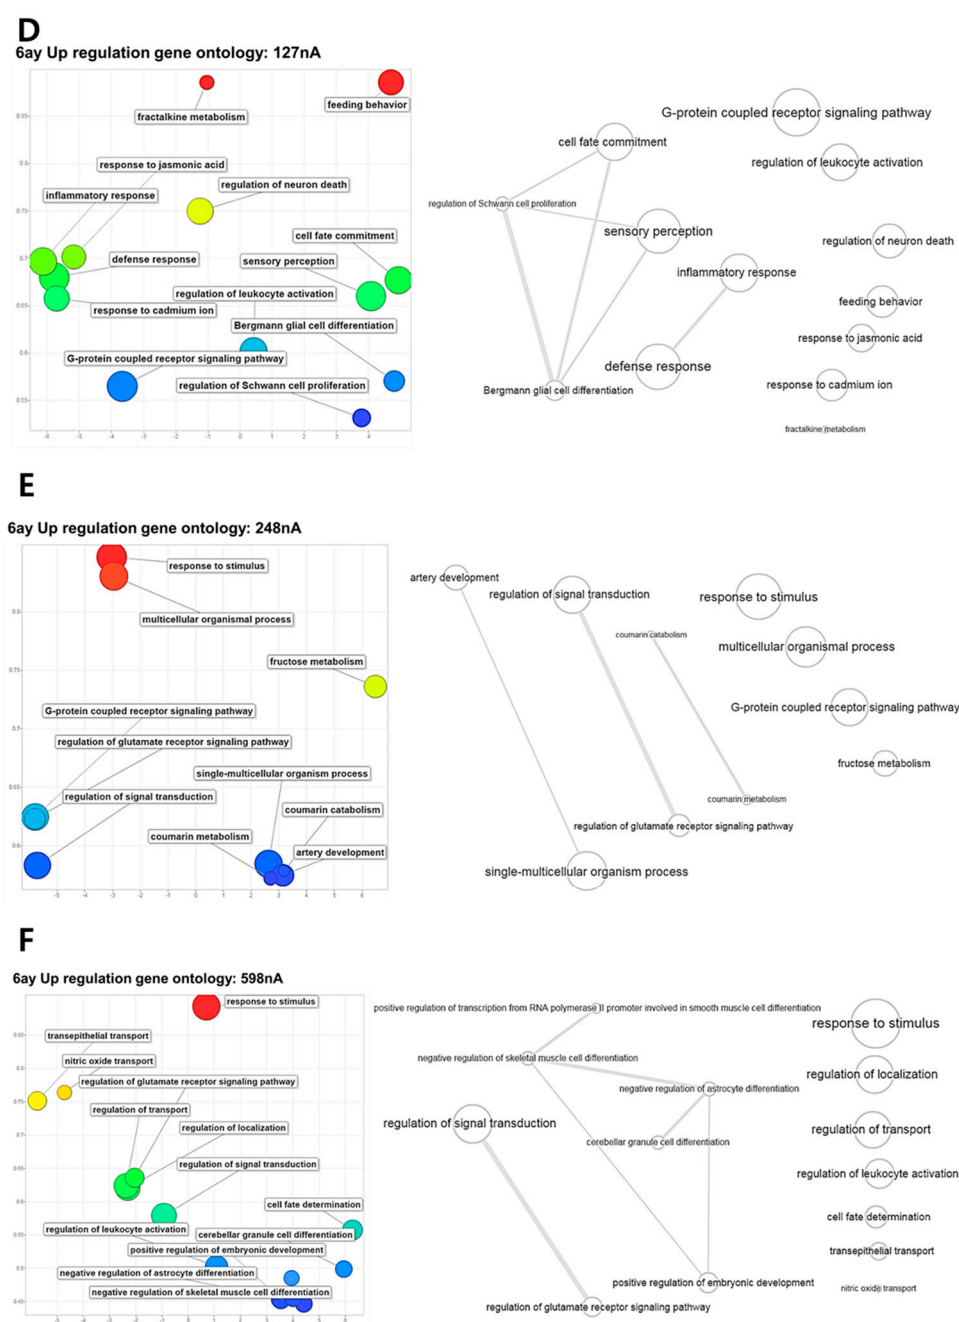

**Figure S3** Interactive graph of GO functions for up-regulated DEGs in electrically-stimulated hAC-MSCs on day 3 (A) 127 nA, (B) 248 nA and (C) 598 nA; on day 6 (D) 127 nA, (E) 248 nA and (F) 598 nA. The top 20 GO terms (sorted by p value) are shown. The identified GO terms and representative term subsets were converted into a network layout. A circular node represents each term, and its size is proportional to the number of input genes included in that term. The color represents the p-value of a given term, with darker color representing higher statistical significance. Terms with a similarity score > 0.3 are linked by an edge (the edge thickness represents the similarity score). Up- and down regulated genes in the top-ranking list are graphically represented depending on the culture day. Scatter plots with x and y coordinates assigned to each term reflect the close relationship between semantically-similar GO terms in the plot. In the left scatter plot, cycle color enriched GO data represent that red and orange cycles are GO terms with more significant log10 p-values than the green and blue cycles compare with control groups. In addition, each scatter plot clearly represents the unique changes in gene expression. Further, each plot correlates the cellular response to electrical current range. The right interactive graph also visualizes the co-relationship of each gene on the scatter plot. Bubble size indicates the GO term assignment frequency in the underlying biological signaling process. Highly-similar GO terms are linked by edges in the graph, where the line width indicates the degree of similarity.
